# Supplementary material
Source: publisher figshare collection journal article supplement (https://tandf.figshare.com/articles/dataset/_/4789342)
Supplement: Supplementary file 1 [file 1]

Archive with 2 entries (2 files):
- tlct_a_1308022_sm8648.avi
- tlct_a_1308022_sm8647.pdf
