# Supplementary material
Source: publisher figshare collection journal article supplement (https://tandf.figshare.com/articles/dataset/_/4789342)
Supplement: Supplementary file 1 [file 1 › tlct_a_1308022_sm8647.pdf]

---

## Supporting Information

### Synthesis and Characterization of biodegradable liquid crystal elastomer with the property of shape recovery

Mingyao Xu, Yuehua Cong and Baoyan Zhang\*

#### SI-1: Synthesis of liquid crystal (LC) molecule

Cholesterol (77.4g, 0.2mol) dissolved in dry chloroform (140ml) and dry pyridine (20ml) was added to a round bottom flask equipped with a condenser and thermometer. Then adipoyl chloride (91.5g, 0.5mol) was added dropwise to the flask. The reaction mixture was refluxed 5-6 hours. The chloroform was distilled off under reduced pressure. The residue was poured into water at 45°C, washed by hot water to neutral PH. The precipitate was isolated by filtration and washed with acetone, recrystallized in acetone and dried in a vacuum oven to obtain a white powder, Cholest-5-en-3-ol (3 $\beta$ )-, 3-(hydrogen pentanedioate). Yield: 83.2%.

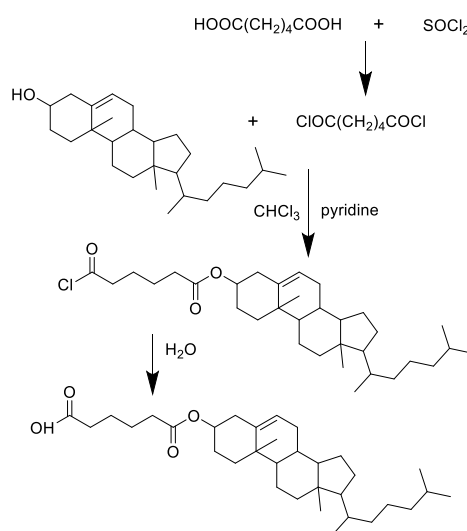

**Scheme S1. Schematic of synthesis of the LC molecular.**

Then put M1 (15.45g, 0.03mol) in a round bottom flask equipped with an absorption apparatus to absorb hydrogen chloride, then 30mL  $\text{SOCl}_2$  was dropwise added in. The mixture was stirred at room temperature for 0.5h, then stirred at 60°C for 4h. The excess thionyl chloride was distilled off under reduced pressure. Yellow powder was obtained.

## SI-2: Characterisation of the LC molecule(M1)

DSC curves of M1 are shown in Figure S1. The melting point is at 131°C and clearing point at 142°C. When M1 is cooled down, a crystallisation point was found. The optical texture of M1 was determined by POM with a heating stage. Photographs of M1 are shown in Figure S2. A typical cholesteric Oily streak texture appeared at 131°C (Figure S2a), when M1 was heated to 142°C (Figure S2b), an isotropic phase appeared. However, when M1 was cooled from 142°C to 86°C, Droplet texture was displayed (Figure S2c). When the temperature was below 86°C, M1 was crystalline (Figure S2d).

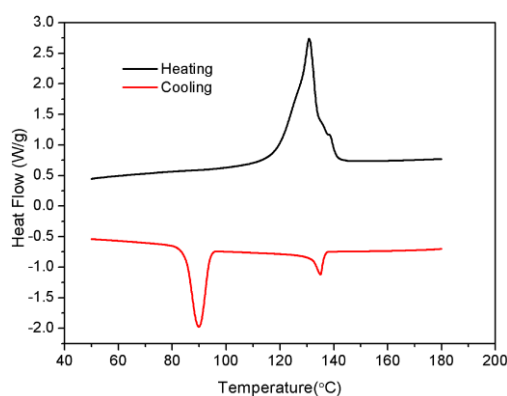

**Figure S1. DSC curve of M1.**

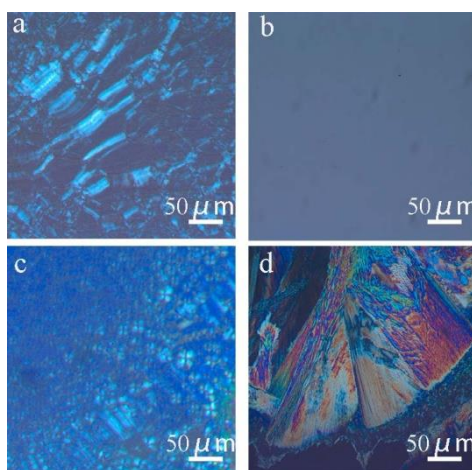

**Figure S2.** The POM texture of M1, (a) heating to 133°C, (b) heating to 142°C, (c) cooling to 123°C, (d) cooling to 80°C.

## SI-3: FTIR spectroscopy

To characterize the structure of the outcome, FTIR spectroscopy is used. From Scheme S2, we can see the process of the reaction. IR of Pb (KBr,  $\text{cm}^{-1}$ ): 2953, 2877 ( $-\text{CH}_3$ ,  $-\text{CH}_2-$ ,  $-\text{CH}-$ ), 3466 – 2500 ( $-\text{OH}$  in carboxylic acid), 1749, 1690 ( $\text{C}=\text{O}$ ), 1266 (secondary alcohol,  $-\text{OH}$ ). IR

of Pa (KBr,  $\text{cm}^{-1}$ ): 2953, 2852 ( $-\text{CH}_3$ ,  $-\text{CH}_2-$ ,  $-\text{CH}-$ ), 3470-2433 ( $-\text{OH}$  in carboxylic acid), 1720, 1697 ( $\text{C}=\text{O}$ ), 1171 ( $\text{C}-\text{O}-\text{C}$ ). The absorption peak at  $1266 \text{ cm}^{-1}$  turned weak after attaching LC, which was due to the LC reacted with the secondary alcohol. (Figure S3)

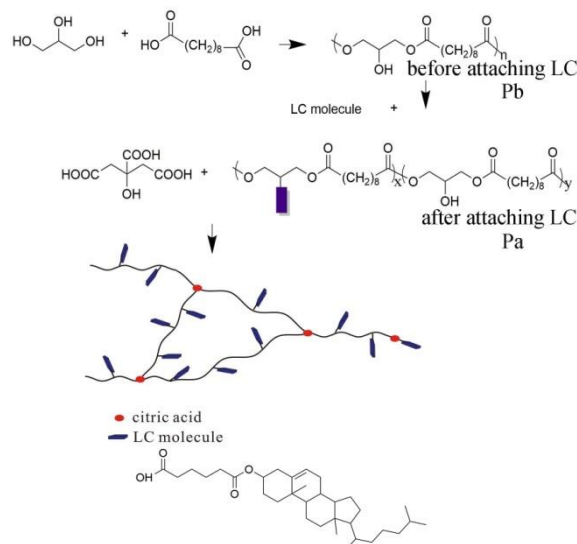

**Scheme S2.** The synthetic route of the polymer.

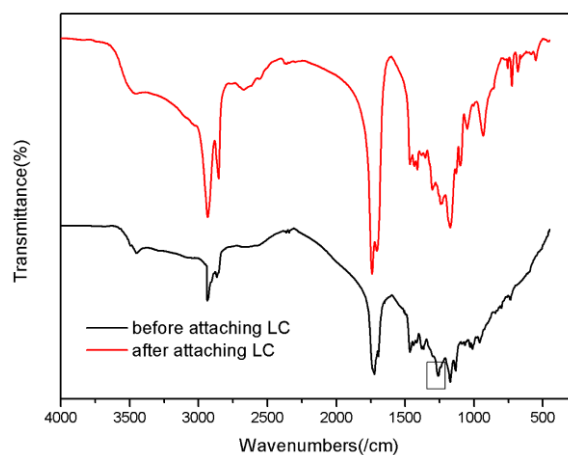

**Figure S3.** FTIR spectroscopy of polymer before and after attaching LC molecule.

**SI-4:** The process of the BLCE recovering to the original shape, when the sample was put on the heating stage at  $120^{\circ}\text{C}$ , which is recorded in Video S1.
